# Supplementary material for: DNA Barcoding and Phylogeny of Acari Species Based on ITS and COI Markers
Source: Hindawi journal article supplement (doi:10.1155/2022/5317995), 2022-06-21
Supplement: f1 [file 5317995.f1.zip]

## Supporting data

### DNA barcoding and phylogeny of Acari species based on ITS and COI markers

Consuelo Pérez-Sayas<sup>1,\$</sup>, Tatiana Pina<sup>1,3,\$</sup>, Beatriz Sabater-Muñoz<sup>2,4,\*</sup>, María Antonia Gómez-Martínez<sup>1</sup>, Josep A. Jaques<sup>1</sup>, Mónica A. Hurtado-Ruiz<sup>1,\*</sup>

<sup>\$</sup>Both authors contributed equally to this manuscript and should be considered as first authors.

<sup>\*</sup>Both are Corresponding authors.

List of Supporting Information:

**Table S1.** List of all sequences used in this work.

**Table S2.** List of primers used to generate the 3' COI fragment, ITS1, ITS2 or whole ITS from either Phytoseiidae or Tetranychidae used in this work.

**Table S3.** New Acari mitochondrial COI sequences obtained in this work.

**Table S4.** New ITS sequences obtained in this work.

**Table S5.** Estimates of evolutionary divergence distance between Acari COI sequences.

This excel file contains several sheets, first one with interspecific distances  $\pm$  SE, and the others with intraspecific distances  $\pm$  SE (one sheet per species).

**Table S6.** Estimates of evolutionary divergence distance between Acari ITS sequences.

This excel file contains several sheets, first one with interspecific distances  $\pm$  SE, and the others with intraspecific distances  $\pm$  SE (one sheet per species).

**Figure S1.** Evolutionary relationships of Acari taxa based on 43 Acari Cytochrome C oxidase I (COI) fragment sequences inferred by BEAST (Bayesian analysis), including three different sequences from *Euseius nicholsi*.

**Figure S2.** Evolutionary relationships of Acari taxa based on 61 Acari Cytochrome C

29    oxidase I (COI) fragment sequences inferred by MEGA X (Kumar *et al.*, 2018), using the  
30    Maximum Likelihood (ML) method.  
31    **Figure S3.** Evolutionary relationships of Acari taxa based on 157 Acari Internal  
32    Transcribed Spacer (ITS) fragment sequences inferred by MEGA X (Kumar *et al.*, 2018),  
33    using the Maximum Likelihood (ML) method.
