# Supplementary material for: DNA Barcoding and Phylogeny of Acari Species Based on ITS and COI Markers
Source: Hindawi journal article supplement (doi:10.1155/2022/5317995), 2022-06-21
Supplement: f1 [file 5317995.f1.zip]

## **Supporting data**

### **DNA barcoding and phylogeny of Acari species based on ITS and COI markers**

Consuelo Pérez-Sayas<sup>1,§</sup>, Tatiana Pina<sup>1,3,§</sup>, Beatriz Sabater-Muñoz<sup>2,4,\*</sup>, María Antonia Gómez-Martínez<sup>1</sup>, Josep A. Jaques<sup>1</sup>, Mónica A. Hurtado-Ruiz<sup>1,\*</sup>

<sup>1</sup>Unitat Associada d'Entomologia UJI-IVIA, Departament de Ciències Agràries i del Medi Natural, Universitat Jaume I (UJI), Campus del Riu Sec, 12071 Castelló de la Plana, Spain.

<sup>2</sup>Smurfit Institute of Genetics, Trinity College Dublin, University of Dublin. College Green, Dublin2 Dublin, Ireland.

<sup>3</sup>Department of Experimental and Social Sciences Education, Universitat de València, Avda. Tarongers, 46022 Valencia, Spain.

<sup>4</sup>Integrative Systems Biology, Department of Plant stress, Institute of Plant Molecular and Cellular Biology (IBMCP) of the Spanish National Research Council (CSIC) -Polytechnic University of Valencia (UPV), Ingeniero Fausto Elio, 46022 Valencia, Spain.

<sup>§</sup>Both authors contributed equally to this manuscript and should be considered as first authors.

<sup>\*</sup>Both are Corresponding authors.

This file contains all supporting information described in the main manuscript. The references indicated at each Table or Figure legend are at the end of the document.

Due to the length of Tables S5 and S6, interspecific distances are provided in additional excel files.

**Table S1.** List of all sequences used in this work, nos: non-overlapping sequence, \* identical sequence within marker and species, § sequences obtained in this work.

| Superorder                                |                                    |                   | COI        | ITS       |           |
|-------------------------------------------|------------------------------------|-------------------|------------|-----------|-----------|
| Order                                     | Species                            | Locality          |            | ITS1      | ITS2      |
| Suborder (number of sequences in GenBank) |                                    | Haplotype         |            |           |           |
| <b>Aranea</b>                             |                                    |                   |            |           |           |
|                                           | <i>Enoplognatha ovata</i>          | Scotland (UK)     |            |           | AF084942  |
|                                           | <i>Latrodectus katipo</i>          | New Zealand       |            |           | EU309679  |
|                                           | <i>Lycosa coelestis</i>            | Japan             | AB564730   |           |           |
|                                           | <i>Pardosa tristis</i>             | USA               |            |           | JF791412  |
| <b>Acariformes</b>                        |                                    |                   |            |           |           |
| <b>Sarcoptiformes (18,758)</b>            |                                    |                   |            |           |           |
| <b>Astigmata (9,280)</b>                  |                                    |                   |            |           |           |
|                                           | <i>Avenzoaria totani</i>           | Poland            |            |           | AY684432  |
|                                           | <i>Otodectes cynotis</i>           | China             |            |           | KP676677  |
|                                           | <i>Proctophyllodes ateri</i>       | Poland            |            |           | AY705374  |
|                                           | <i>Rhizoglyphus echinopus</i>      | The Netherlands   |            |           | EF362629  |
|                                           | <i>Rhizoglyphus setosus</i>        | Taiwan            |            |           | DQ372569  |
| <b>Oribatidae (8,817)</b>                 |                                    |                   |            |           |           |
|                                           | <i>Platynothrus peltifer</i>       | Poland            |            |           | AY707282  |
|                                           | <i>Scutovertex arenocolus</i>      | Austria           | GU208579   |           |           |
|                                           | <i>Scutovertex sculptus</i>        | Austria           | GQ890429   |           |           |
|                                           | <i>Steganacarus magnus</i>         | Germany           | EU935607   |           |           |
| <b>Trombidiformes (48,661)</b>            |                                    |                   |            |           |           |
| <b>Prostigmata (48,143)</b>               |                                    |                   |            |           |           |
|                                           | <i>Amphitetranychus viennensis</i> | Tokyo (Japan)     | AB981239   |           |           |
|                                           |                                    | Taiwan            |            |           | FJ969820  |
|                                           | <i>Aplonobia histricina</i>        | Montcada (Spain)  | GU565318§  | GU565291§ | GU565304§ |
|                                           | <i>Bryobia kissophila</i>          | The Netherlands   | EU487069   |           |           |
|                                           | <i>Bryobia praetiosa</i>           | Israel            |            |           | DQ656439  |
|                                           | <i>Cecidophyopsis psilaspis</i>    | United Kingdom    |            | AJ297577  |           |
|                                           | <i>Cecidophyopsis ribis</i>        | United Kingdom    |            | AJ297574  |           |
|                                           | <i>Eotetranychus carpini</i>       | Italy             |            |           | GU130303  |
|                                           | <i>Eutetranychus banksi</i>        | Huelva (Spain)    | GU565319§  | GU565292§ | KP642050§ |
|                                           | <i>Eutetranychus orientalis</i>    | Israel            | DQ656481   |           |           |
|                                           |                                    | Málaga (Spain)    |            | KP642049§ | KP642048§ |
|                                           | <i>Oligonychus camelliae</i>       | Japan             | AB683663   |           |           |
|                                           | <i>Oligonychus gotohi</i>          | Japan             |            |           | AB757828  |
|                                           | <i>Oligonychus hondoensis</i>      | Aomori (Japan)    | AB683658   |           |           |
|                                           | <i>Oligonychus karamatus</i>       | Hokkaido (Japan)  | AB683656   |           |           |
|                                           | <i>Oligonychus perseae</i>         | Israel            | DQ656485   |           |           |
|                                           |                                    | Málaga (Spain)    |            | GU565293§ | GU565305§ |
|                                           | <i>Panonychus citri</i>            | Betxí (Spain)     | GU565321*§ |           | AM408034* |
|                                           |                                    | Castelló (Spain)  | GU565321*§ |           | AM408034* |
|                                           |                                    | Montcada (Spain)  | GU565321*§ |           | AM408034* |
|                                           |                                    | Mallorca (Spain)  | GU565321*§ |           | KP642051§ |
|                                           |                                    | Picassent (Spain) | GU565321*§ |           | AM408034* |
|                                           |                                    | Xeraco (Spain)    | GU565321*§ |           | AM408034* |
|                                           |                                    | Canet (Spain)     | GU565321*§ |           | AM408034* |
|                                           |                                    | Moncofa (Spain)   |            |           | AM408039  |

| Superorder                                |                                         |                       | COI                    | ITS                   |                       |
|-------------------------------------------|-----------------------------------------|-----------------------|------------------------|-----------------------|-----------------------|
| Order                                     | Species                                 | Locality              |                        | ITS1                  | ITS2                  |
| Suborder (number of sequences in GenBank) |                                         | Haplotype             |                        |                       |                       |
|                                           | <i>Petrobia harti</i>                   | Jiangsu (China)       | GQ141920               |                       |                       |
|                                           | <i>Tetranychus evansi</i>               | Brazil                | GU565322 <sup>§</sup>  | GU565294 <sup>§</sup> | GU565306 <sup>§</sup> |
|                                           |                                         | Castelló (Spain)      |                        | AM408033              |                       |
|                                           |                                         | Huelva (Spain)        |                        | GU565295 <sup>§</sup> | GU565307 <sup>§</sup> |
|                                           |                                         | Kenia                 |                        |                       | AJ419833              |
|                                           |                                         | Tokyo (Japan)         |                        | AB735996              |                       |
|                                           |                                         | Madeira (Portugal)    |                        | AM408036              | AM408047              |
|                                           |                                         | Murcia (Spain)        | GU565325 <sup>§</sup>  | GU565296 <sup>§</sup> | GU565308 <sup>§</sup> |
|                                           |                                         | Italy (Sicily)        |                        | GU565297 <sup>§</sup> | GU565309 <sup>§</sup> |
|                                           |                                         | Valencia (Spain)      | KP642060 <sup>§</sup>  | GU565298 <sup>§</sup> | GU565310 <sup>§</sup> |
|                                           | <i>Tetranychus ezoensis</i>             | Iwate (Japan)         |                        | AB735998              |                       |
|                                           | <i>Tetranychus kanzawai</i>             | China                 | KJ729017               |                       |                       |
|                                           |                                         | Japan                 |                        |                       | AB736006              |
|                                           | <i>Tetranychus lambi</i>                | Japan                 |                        |                       | AB738743              |
|                                           | <i>Tetranychus ludeni</i>               | Castelló (Spain)      |                        | AM408037              | AM408040              |
|                                           |                                         | China                 | KJ729018               | KP744529              |                       |
|                                           |                                         | Kishigawa (Japan)     |                        | AB076371              |                       |
|                                           | <i>Tetranychus malaysiensis</i>         | China                 | KJ729019               |                       |                       |
|                                           |                                         | Yokohama (Japan)      |                        |                       | AB738756              |
|                                           | <i>Tetranychus merganser</i>            | Yokohama (Japan)      |                        |                       | AB738753              |
|                                           | <i>Tetranychus neocaledonicus</i>       | Yokohama (Japan)      |                        |                       | AB738752              |
|                                           | <i>Tetranychus okinawanus</i>           | Tampa (Florida)       |                        | KP642047 <sup>§</sup> | GU565311 <sup>§</sup> |
|                                           |                                         | Okinawa (Japan)       | AB736059               | AB257743              |                       |
|                                           |                                         | Okinawa (Japan)       | AB736058               |                       |                       |
|                                           | <i>Tetranychus pacificus</i>            | Yokohama (Japan)      |                        | AB738744              |                       |
|                                           | <i>Tetranychus parakanzawai</i>         | Ibaraki (Japan)       |                        | AB257745              |                       |
|                                           | <i>Tetranychus phaselus</i>             | China                 | KJ729020               |                       |                       |
|                                           |                                         | Okinawa (Japan)       |                        |                       | AB736024              |
|                                           | <i>Tetranychus piercei</i>              | Ibaraki (Japan)       |                        | AB257748              |                       |
|                                           | <i>Tetranychus pueraricola</i>          | China                 | KJ729021               |                       |                       |
|                                           |                                         | Japan                 |                        | KP744528              |                       |
|                                           | <i>Tetranychus takafujii</i>            | Tokyo (Japan)         |                        | AB257747              |                       |
|                                           | <i>Tetranychus turkestanii</i>          | Castelló (Spain)      | GU565323 <sup>§</sup>  | AM408038              | AM408041              |
|                                           |                                         | France                |                        | AM408032              |                       |
|                                           |                                         | Japan                 |                        | AB738745              |                       |
|                                           | <i>Tetranychus truncatus</i>            | Shanghai (China)      |                        | AB738749              |                       |
|                                           | <i>Tetranychus urticae</i> strain red   | China                 | KJ729023               |                       |                       |
|                                           | <i>Tetranychus urticae</i> strain green | China                 | KJ729022               |                       |                       |
|                                           | <i>Tetranychus urticae</i>              | Amposta (Spain)       | KP642065 <sup>§</sup>  | GU565303 <sup>§</sup> | AM408042              |
|                                           |                                         | Betxí (Spain)         | KP642064 <sup>§</sup>  | GU565299 <sup>§</sup> | AM408043              |
|                                           |                                         | Callosa (Spain)       | KP642066 <sup>§</sup>  | KP642054 <sup>§</sup> | AM408044              |
|                                           |                                         | Castelló (Spain)      | GU565324* <sup>§</sup> | AM408030              |                       |
|                                           |                                         | France                |                        | AM408031              |                       |
|                                           |                                         | Gainesville (Florida) |                        | AM408035              |                       |
|                                           |                                         | Llíria (Spain)        | GU565324* <sup>§</sup> | GU565300 <sup>§</sup> | GU565313 <sup>§</sup> |
|                                           |                                         | Mallorca (Spain)      | GU565324* <sup>§</sup> |                       | KP642053 <sup>§</sup> |
|                                           |                                         | Málaga (Spain)        | GU565324* <sup>§</sup> | GU565301 <sup>§</sup> | GU565314 <sup>§</sup> |

| Superorder                                   |                                                                    |                                | COI                   | ITS        |            |
|----------------------------------------------|--------------------------------------------------------------------|--------------------------------|-----------------------|------------|------------|
| Order                                        |                                                                    | Species                        | Locality<br>Haplotype | ITS1       | ITS2       |
| Suborder (number of<br>sequences in GenBank) |                                                                    |                                |                       |            |            |
|                                              |                                                                    |                                | Moncofa (Spain)       |            | AM408045   |
|                                              |                                                                    |                                | Onda (Spain)          | GU565324*§ | AM408046   |
|                                              |                                                                    |                                | Tampa (Florida)       | KP642052§  | GU565312§  |
|                                              |                                                                    |                                | Ibaraki (Japan)       |            | AB257738   |
| <b>Parasitiformes</b>                        |                                                                    |                                |                       |            |            |
| <b>Ixodida (935,706)</b>                     |                                                                    |                                |                       |            |            |
|                                              | <i>Boophilus microplus</i>                                         | Australia                      |                       |            | U97713     |
|                                              | <i>Ixodes hexagonus</i>                                            | Karlsruhe<br>(Germany)         |                       |            | GQ924083   |
|                                              | <i>Ixodes ovatus</i>                                               | Nepal                          |                       |            | AB103043   |
|                                              | <i>Ixodes pavlovskyi</i>                                           | Tomsk (Russia)                 |                       |            | KP242014   |
|                                              | <i>Ixodes scapularis</i>                                           | Pennsylvania<br>(USA)          | KJ721452              |            |            |
|                                              | <i>Ixodes uriae</i>                                                | Bird Island (South<br>Georgia) |                       |            | D88307     |
|                                              | <i>Rhipicephalus annulatus</i>                                     | Guilan (Iran)                  | KM888754              |            |            |
|                                              |                                                                    | Romania                        |                       |            | KC503267   |
|                                              | <i>Rhipicephalus microplus</i>                                     | India                          |                       |            | JX974346   |
| <b>Mesostigmata (120,246)</b>                |                                                                    |                                |                       |            |            |
|                                              | <i>Amblyseius alpinus</i>                                          | The Netherlands                |                       |            | FJ515685   |
|                                              | <i>Amblyseius (Neoseiulus)</i><br><i>andersoni</i>                 | Biobest                        |                       |            | GU565288§  |
|                                              |                                                                    | Syngenta                       | KU342792              |            | KP642041§  |
|                                              |                                                                    | Lleida (Spain)                 |                       |            | KP642040*§ |
|                                              |                                                                    | Girona (Spain)                 |                       |            | KP642040*§ |
|                                              |                                                                    | France                         |                       |            | HQ404823   |
|                                              |                                                                    | The Netherlands                |                       |            | EU310504   |
|                                              |                                                                    | France                         |                       |            | HQ404822   |
|                                              | <i>Amblyseius deleoni</i>                                          | China                          |                       |            | GU128958   |
|                                              | <i>Amblyseius eharai</i>                                           | Shanghai (China)               |                       |            | HQ290321   |
|                                              | <i>Amblyseius orientalis</i>                                       | Xingan (China)                 |                       |            | HQ290322   |
|                                              | <i>Amblyseius tsugawai</i>                                         | Ibaraki (Japan)                |                       |            | AB618063   |
|                                              |                                                                    | China                          |                       |            | GU244502   |
|                                              | <i>Amblyseius</i><br><i>(Typhlodromips)</i><br><i>montdorensis</i> | Syngenta Bioline               |                       |            | HQ404824   |
|                                              | <i>Arrenoseius urquharti</i>                                       | Guadeloupe<br>(France)         |                       |            | HQ404819   |
|                                              | <i>Dermanyssus gallinae</i>                                        | Italy                          |                       |            | JN212137   |
|                                              | <i>Euseius environmental</i><br>sample                             | China                          |                       |            | KM108755   |
|                                              | <i>Euseius finlandicus</i>                                         | France                         | FJ404593              |            |            |
|                                              |                                                                    | Tammela<br>(Finland)           |                       |            | AF209437   |
|                                              | <i>Euseius nicholsi</i>                                            | China                          | KF308635              |            |            |
|                                              |                                                                    | China                          | KF308681              |            | GU244501   |
|                                              |                                                                    | China                          | KF308643              |            |            |
|                                              | <i>Euseius ovalis</i>                                              | The Netherlands                |                       |            | FJ515687   |
|                                              | <i>Euseius scutalis</i>                                            | Málaga (Spain)                 | KP642056§             |            | KP642044§  |
|                                              | <i>Euseius sojaensis</i>                                           | Ibaraki (Japan)                |                       |            | AB618064   |
|                                              |                                                                    | Nagasaki (Japan)               |                       |            | AB618065   |
|                                              | <i>Euseius stipulatus</i>                                          | Montcada (Spain)               | GU565320§             |            | GU565290   |
|                                              |                                                                    | Málaga (Spain)                 | KP642057§             |            | KP642043§  |
|                                              | <i>Iphiseius degenerans</i>                                        | Sicily (Italy)                 |                       |            | HQ404800   |

| Superorder                                   |                                                               |                          | COI                   | ITS                   |
|----------------------------------------------|---------------------------------------------------------------|--------------------------|-----------------------|-----------------------|
| Order                                        | Species                                                       | Locality<br>Haplotype    |                       | ITS1 ITS2             |
| Suborder (number of<br>sequences in GenBank) |                                                               |                          |                       |                       |
|                                              |                                                               | Gainesville<br>(Florida) |                       | AY121984              |
|                                              | <i>Kampimodromus aberrans</i>                                 | France                   | EF372606              | HQ404798              |
|                                              |                                                               | France                   | EF372605              |                       |
|                                              |                                                               | Italy                    |                       | GU591683              |
|                                              | <i>Kampimodromus corylosus</i>                                | France                   | EF372604              | HQ404799              |
|                                              | <i>Kampimodromus ericinus</i>                                 | France                   | EF372607              |                       |
|                                              | <i>Metaseiulus occidentalis</i>                               | Gainesville<br>(Florida) | NC009093              |                       |
|                                              | <i>Neoseiulus agrestis</i>                                    | France                   |                       | HQ404814              |
|                                              | <i>Neoseiulus baraki</i>                                      | Brazil                   | JQ609092              |                       |
|                                              | <i>Neoseiulus barkeri</i>                                     | Castelló (Spain)         |                       | KP642055              |
|                                              |                                                               | Syngenta Bioline         | KU342794 <sup>§</sup> | KP642042 <sup>§</sup> |
|                                              |                                                               | Tunisia                  |                       | HQ404813              |
|                                              |                                                               | China                    |                       | FJ392365              |
|                                              |                                                               | The Netherlands          |                       | FJ515686              |
|                                              | <i>Neoseiulus californicus</i>                                | Koppert                  | KP642059              |                       |
|                                              |                                                               | Koppert                  |                       | HQ404806              |
|                                              |                                                               | Koppert                  |                       | HQ404804              |
|                                              |                                                               | Koppert                  |                       | HQ404807              |
|                                              |                                                               | Chiba (Japan)            |                       | AB618055              |
|                                              |                                                               | Italy                    |                       | GU591680              |
|                                              |                                                               | France                   |                       | Y18269                |
|                                              | <i>Neoseiulus cucumeris</i>                                   | (Baillargues)            |                       |                       |
|                                              |                                                               | Koppert                  | KU342793 <sup>§</sup> |                       |
|                                              |                                                               | Gainesville<br>(Florida) |                       | AY121985              |
|                                              | <i>Neoseiulus idaeus</i>                                      | Piracicaba<br>(Brazil)   |                       | JF776278              |
|                                              | <i>Neoseiulus picanus</i>                                     | Chile                    |                       | HQ404811              |
|                                              |                                                               | Argentina                |                       | JF279120              |
|                                              | <i>Neoseiulus reductus</i>                                    | The Netherlands          |                       | GU966582              |
|                                              | <i>Neoseiulus</i><br>( <i>Typhlodromips</i> ) <i>swirskii</i> | Koppert                  | GU565317 <sup>§</sup> | GU565289              |
|                                              |                                                               | The Netherlands          |                       | EU310505              |
|                                              |                                                               | Israel                   |                       | HQ404821              |
|                                              | <i>Neoseiulus tunus</i>                                       | Brazil                   |                       | HQ404812              |
|                                              | <i>Neoseiulus womersleyi</i>                                  | Nara (Japan)             |                       | AB618061              |
|                                              |                                                               | Okinawa (Japan)          |                       | AB618060              |
|                                              |                                                               | Japan                    |                       | HQ404820              |
|                                              | <i>Neoseiulella aceri</i>                                     | Kiev (Ukraine)           |                       | GU938179              |
|                                              | <i>Neoseiulella litoralis</i>                                 | France                   |                       | GU938187              |
|                                              |                                                               | France                   |                       | GU938186              |
|                                              | <i>Neoseiulella tiliarum</i>                                  | France                   |                       | GU938146              |
|                                              | <i>Phytoseiulus fragariae</i>                                 | Argentina                | nos                   | GU591665              |
|                                              |                                                               | Argentina                | nos                   | GU591666              |
|                                              | <i>Phytoseiulus longipes</i>                                  | Argentina                | nos                   | HQ404815              |
|                                              |                                                               | South Africa             | nos                   | GU591679              |
|                                              |                                                               | Argentina                | nos                   | HQ404816              |
|                                              | <i>Phytoseiulus macropilis</i>                                | Argentina                | nos                   | GU591659              |
|                                              | <i>Phytoseiulus persimilis</i>                                | Koppert                  | KP642058              |                       |
|                                              |                                                               | Cavaillon<br>(France)    | nos                   | Y18268                |
|                                              |                                                               | France                   | nos                   | HQ404818              |
|                                              |                                                               | Spain                    |                       | GU591670              |

| Superorder                                   |                                 |                       | COI                   | ITS                   |
|----------------------------------------------|---------------------------------|-----------------------|-----------------------|-----------------------|
| Order                                        | Species                         | Locality<br>Haplotype |                       | ITS1 ITS2             |
| Suborder (number of<br>sequences in GenBank) |                                 |                       |                       |                       |
|                                              |                                 | France                | nos                   | HQ404817              |
|                                              |                                 | France                | nos                   | GU591668              |
|                                              | <i>Ptilonyssus sairae</i>       | California (USA)      | nos                   | EU190986              |
|                                              | <i>Tropilaelaps clareae</i>     | Thailand              | nos                   | AF544013              |
|                                              | <i>Tropilaelaps koenigerum</i>  | Thailand              | nos                   | AF544014              |
|                                              | <i>Typhlodromalus limonicus</i> | The Netherlands       | nos                   | HM189291              |
|                                              | <i>Tropilaelaps mercedesae</i>  | Thailand              | nos                   | HM748316              |
|                                              | <i>Typhlodromus phialatus</i>   | Montcada (Spain)      | KP642063              | GU565315              |
|                                              |                                 | Girona (Spain)        | KP642061 <sup>§</sup> | KP642045 <sup>§</sup> |
|                                              |                                 | Lleida (Spain)        | KP642062 <sup>§</sup> | KP642046 <sup>§</sup> |
|                                              |                                 | France                | nos                   | JN793515              |
|                                              |                                 | France                | nos                   | JF279155              |
|                                              | <i>Typhlodromus rhenanoides</i> | Montcada (Spain)      | nos                   | KU342786 <sup>§</sup> |
|                                              | <i>Typhlodromus vulgaris</i>    | Nagasaki (Japan)      | nos                   | AB862881              |
|                                              | <i>Scapulaseius okinawanus</i>  | Nagasaki (Japan)      | nos                   | AB862880              |
|                                              | <i>Varroa jacobsoni</i>         | Australia             | nos                   | EF025470              |

Authorities for each species are indicated in the main text.

**Table S2.** List of primers used to generate the Acari COI fragment covering the 3' end of *coi* gene, ITS1, ITS2 or whole ITS fragments from either Phytoseiidae or Tetranychidae used in this work.

| Region /<br>Primer type | Primer name | Sequence (5'→ 3')              | Source                       |
|-------------------------|-------------|--------------------------------|------------------------------|
| <b>COI</b>              |             |                                |                              |
| Forward primers         | COIF        | TGATTTTTTGGTCACCCAGAAG         | Navajas <i>et al.</i> (1996) |
|                         | ASCOIF      | TTTTGGTCACCCAGAAG              | This work                    |
|                         | EOCOIF      | CGGGGTTTGGTATAATTTCTC          | This work                    |
|                         | RHCO2198    | TGATTTTTTGGTCACCCTGAAGTTTA     | This work                    |
| Reverse primers         | COIR        | TACAGCTCCTATAGATAAAAC          | Navajas <i>et al.</i> (1996) |
|                         | ASCOIR      | ATAAAACATAATGAAAATGAGC         | This work                    |
| <b>ITS</b>              |             |                                |                              |
| Forward primers         | 18S         | AGAGGAAGTAAAAGTCGTAACAAG       | Ali <i>et al.</i> (2000)     |
|                         | 5.8S        | ATCTTCAAGCGGTGGATCAC           | Hurtado <i>et al.</i> (2008) |
|                         | LC1         | GGCAAAGATACATCTTCAAGC          | This work                    |
|                         | LC2         | TACCAATCGATGAAGAACGTAGC        | This work                    |
|                         | TC1         | AAGGTTTCCGTAGGTGAACC           | This work                    |
| Reverse primers         | 28S         | ATATGCTTAAATTCAGGGGG           | Ali <i>et al.</i> (2000)     |
|                         | 28S uni     | TTCTTTTCCTCCGCTTAGTGATATGCTTAA | Ji <i>et al.</i> (2003)      |
|                         | 5.8S rev    | GTGATCCACCGCTTGAAGAT           | This work                    |
|                         | TC2         | ACTTTTAATAAGTATCCTAA           | This work                    |

**Table S3.** Acari mitochondrial COI sequences obtained in this work. With indication of sample origin, host plant, accession number, total length, primers used, and annealing temperature.

| Species                       | Origin                                 | Host plant                  | Accession number | Total length (bp) | Primer direct | Primer reverse | Annealing Temperature (°C) |
|-------------------------------|----------------------------------------|-----------------------------|------------------|-------------------|---------------|----------------|----------------------------|
| Suborder Mesostigmata         |                                        |                             |                  |                   |               |                |                            |
| <i>Amblyseius andersoni</i>   | Syngenta Agro                          | Commercial mass rearing     | KU342792         | 435               | EOCOIF        | COIR           | 47                         |
| <i>Euseius scutalis</i>       | Spain (Málaga)                         | <i>Persea americana</i>     | KP642056         | 453               | COIF          | COIR           | 47                         |
| <i>Euseius stipulatus</i>     | Spain (Málaga)                         | <i>Persea americana</i>     | KP642057         | 454               | COIF          | COIR           | 47                         |
| <i>Euseius stipulatus</i>     | Spain (Moncada, Valencia)              | <i>Citrus clementina</i>    | GU565320         | 453               | COIF          | COIR           | 47                         |
| <i>Neoseiulus barkeri</i>     | Syngenta Agro                          | Commercial mass rearing     | KU342794         | 434               | COIF          | ASCOIR         | 47                         |
| <i>Neoseiulus cucumeris</i>   | Koppert Biological Systems             | Commercial mass rearing     | KU342793         | 423               | RHCO2198      | COIR           | 45                         |
| <i>Typhlodromus phialatus</i> | Spain (Girona)                         | <i>Malus domestica</i>      | KP642061         | 413               | EOCOIF        | COIR           | 47                         |
| <i>Typhlodromus phialatus</i> | Spain (Lleida)                         | <i>Malus domestica</i>      | KP642062         | 404               | EOCOIF        | COIR           | 47                         |
| <i>Typhlodromus phialatus</i> | Spain (Lleida)                         | <i>Malus domestica</i>      | KU242791         | 404               | EOCOIF        | COIR           | 47                         |
| <i>Typhlodromus phialatus</i> | Spain (Montcada)                       | <i>Citrus clementina</i>    | KP642063         | 404               | EOCOIF        | COIR           | 47                         |
| Suborder Prostigmata          |                                        |                             |                  |                   |               |                |                            |
| <i>Aplonobia histricina</i>   | Spain (Montcada, Valencia)             | <i>Oxalis pes-caprae</i>    | GU565318         | 453               | COIF          | COIR           | 47                         |
| <i>Eutetranychus banksi</i>   | Spain (Málaga)                         | <i>Citrus clementina</i>    | GU565319         | 405               | COIF          | COIR           | 47                         |
| <i>Panonychus citri</i>       | Spain (Betxí, Castelló)                | <i>Citrus reticulata</i>    | KU342795         | 453               | COIF          | COIR           | 47                         |
| <i>Panonychus citri</i>       | Spain (Canet d'en Berenguer, Valencia) | <i>Citrus reticulata</i>    | KU342796         | 453               | COIF          | COIR           | 47                         |
| <i>Panonychus citri</i>       | Spain (Castelló)                       | <i>Citrus reticulata</i>    | GU565321         | 453               | COIF          | COIR           | 47                         |
| <i>Panonychus citri</i>       | Spain (Mallorca)                       | <i>Citrus sinensis</i>      | KU342797         | 453               | COIF          | COIR           | 47                         |
| <i>Panonychus citri</i>       | Spain (Moncofa)                        | <i>Citrus sinensis</i>      | KU342799         | 453               | COIF          | COIR           | 47                         |
| <i>Panonychus citri</i>       | Spain (Montcada, Valencia)             | <i>Citrus reticulata</i>    | KU342798         | 453               | COIF          | COIR           | 47                         |
| <i>Panonychus citri</i>       | Spain (Picassent, Valencia)            | <i>Citrus reticulata</i>    | KU342800         | 453               | COIF          | COIR           | 47                         |
| <i>Panonychus citri</i>       | Spain (Xeraco, Valencia)               | <i>Citrus reticulata</i>    | KU342801         | 453               | COIF          | COIR           | 47                         |
| <i>Tetranychus evansi</i>     | Brazil                                 | <i>Solanum lycopersicum</i> | GU565322         | 413               | EOCOIF        | COIR           | 47                         |
| <i>Tetranychus evansi</i>     | Spain (Murcia)                         | <i>Solanum nigrum</i>       | GU565325         | 413               | EOCOIF        | COIR           | 47                         |
| <i>Tetranychus evansi</i>     | Spain (Valencia)                       | <i>Solanum lycopersicum</i> | KP642060         | 453               | COIF          | COIR           | 47                         |
| <i>Tetranychus turkestani</i> | Spain (Castelló)                       | <i>Convolvulus arvensis</i> | GU565323         | 403               | COIF          | COIR           | 47                         |
| <i>Tetranychus urticae</i>    | Spain (Amposta, Tarragona)             | <i>Citrus clementina</i>    | KP642065         | 458               | COIF          | COIR           | 47                         |
| <i>Tetranychus urticae</i>    | Spain (Betxí, Castelló)                | <i>Citrus clementina</i>    | KP642064         | 453               | COIF          | COIR           | 47                         |
| <i>Tetranychus urticae</i>    | Spain (Callosa d'en Sarrià, Alicante)  | <i>Citrus clementina</i>    | KP642066         | 453               | COIF          | COIR           | 47                         |
| <i>Tetranychus urticae</i>    | Spain (Castelló)                       | <i>Citrus clementina</i>    | GU565324         | 455               | COIF          | COIR           | 47                         |
| <i>Tetranychus urticae</i>    | Spain (Mallorca)                       | <i>Citrus clementina</i>    | KU342805         | 452               | COIF          | COIR           | 47                         |



**Table S4.** Acari ITS sequences obtained in this work, with description of geographical origin and host-plant, fragment amplified (full ITS indicated as ITS1 and ITS2 with the same accession number), accession number obtained, length of amplified fragment, and primer pair used to amplify each fragment. In this case, annealing temperature was 50°C.

| Species                             | Origin<br>(Country (Locality,<br>County)) | Host plant                  | ITS1 | ITS2 | Accession<br>number | Total<br>length (bp) | Primer<br>direct | Primer<br>reverse |
|-------------------------------------|-------------------------------------------|-----------------------------|------|------|---------------------|----------------------|------------------|-------------------|
| Suborder Mesostigmata               |                                           |                             |      |      |                     |                      |                  |                   |
| <i>Amblyseius andersoni</i>         | Spain (Girona)                            | <i>Malus domestica</i>      | x    | x    | KP642040            | 619                  | 18S              | 28S               |
| <i>Amblyseius andersoni</i>         | Spain (Lleida)                            | <i>Malus domestica</i>      | x    | x    | KP642040            | 619                  | 18S              | 28S               |
| <i>Amblyseius andersoni</i>         | Biobest Biological<br>Systems             | Commercial mass<br>rearing  | x    | x    | GU565288            | 654                  | 18S              | 28Suni            |
| <i>Amblyseius andersoni</i>         | Syngenta Agro                             | Commercial mass<br>rearing  | x    | x    | KP642041            | 597                  | 18S              | 28S               |
| <i>Anthoseius<br/>rhenanoides</i>   | Spain (Montcada,<br>Valencia)             | <i>Citrus limon</i>         | x    | x    | KU342786            | 750                  | 18S              | 28Suni            |
| <i>Euseius scutalis</i>             | Spain (Málaga)                            | <i>Persea americana</i>     | x    | x    | KP642044            | 602                  | 18S              | 28S               |
| <i>Euseius stipulatus</i>           | Spain (Málaga)                            | <i>Persea americana</i>     | x    | x    | KP642043            | 653                  | 18S              | 28S               |
| <i>Neoseiulus barkeri</i>           | Syngenta Agro                             | Commercial mass<br>rearing  | x    | x    | KP642042            | 603                  | 18S              | 28S               |
| <i>Typhlodromus<br/>phialatus</i>   | Spain (Girona)                            | <i>Malus domestica</i>      | x    | x    | KP642045            | 751                  | 18S              | 28S               |
| <i>Typhlodromus<br/>phialatus</i>   | Spain (Lleida)                            | <i>Malus domestica</i>      | x    | x    | KP642046            | 599                  | 18S              | 28S               |
| Suborder Mesostigmata               |                                           |                             |      |      |                     |                      |                  |                   |
| <i>Aplonobia histricina</i>         | Spain (Montcada,<br>Valencia)             | <i>Oxalis pes-caprae</i>    | x    |      | GU565291            | 558                  | 18S              | 5,8Srev           |
|                                     |                                           | <i>Oxalis pes-caprae</i>    |      | x    | GU565304            | 679                  | 5.8S             | 28Suni            |
| <i>Eutetranychus<br/>orientalis</i> | Spain (Málaga)                            | <i>Citrus limon</i>         | x    |      | KP642049            | 606                  | 18S              | 5.8Srev           |
|                                     |                                           |                             |      | x    | KP642048            | 554                  | 5.8S             | 28Suni            |
| <i>Eutetranychus banksi</i>         | Spain (Huelva)                            | <i>Citrus clementina</i>    | x    |      | GU565292            | 483                  | 18S              | 5.8Srev           |
|                                     |                                           |                             |      | x    | KP642050            | 656                  | 5.8S             | 28Suni            |
| <i>Oligonychus perseae</i>          | Spain (Málaga)                            | <i>Persea americana</i>     | x    |      | GU565293            | 415                  | 18S              | 5.8Srev           |
|                                     |                                           | <i>Persea americana</i>     |      | x    | GU565305            | 429                  | LC1              | 28S               |
| <i>Panonychus citri</i>             | Spain (Mallorca)                          | <i>Citrus sinensis</i>      |      | x    | KP642051            | 483                  | LC1              | 28Suni            |
| <i>Tetranychus evansi</i>           | Brasil                                    | <i>Solanum lycopersicum</i> | x    |      | GU565294            | 512                  | 18S              | 5.8Srev           |
|                                     |                                           | <i>Solanum lycopersicum</i> |      | x    | GU565306            | 708                  | 5.8S             | 28Suni            |
| <i>Tetranychus evansi</i>           | Italy (Sicily)                            | <i>Solanum nigrum</i>       | x    |      | GU565297            | 474                  | TC1              | TC2               |
|                                     |                                           |                             |      | x    | GU565309            | 713                  | 5.8S             | 28Suni            |
| <i>Tetranychus evansi</i>           | Spain (Huelva)                            | <i>Solanum nigrum</i>       | x    |      | GU565295            | 467                  | TC1              | 5.8Srev           |
|                                     |                                           |                             |      | x    | GU565307            | 705                  | 18S              | 28Suni            |
| <i>Tetranychus evansi</i>           | Spain (Murcia)                            | <i>Solanum nigrum</i>       | x    |      | GU565296            | 518                  | TC1              | 5.8Srev           |
|                                     |                                           |                             |      | x    | GU565308            | 668                  | LC1              | 28Suni            |
| <i>Tetranychus evansi</i>           | Spain (Valencia)                          | <i>Solanum lycopersicum</i> | x    |      | GU565298            | 434                  | 18S              | 5.8Srev           |
|                                     |                                           |                             |      | x    | GU565310            | 589                  | LC1              | 28S               |
| <i>Tetranychus<br/>okinawanus</i>   | Florida (Tampa)                           | <i>Lilium</i> sp.           | x    |      | KP642047            | 620                  | 18S              | 5.8Srev           |
|                                     |                                           |                             |      | x    | GU565311            | 683                  | LC1              | 28Suni            |
| <i>Tetranychus urticae</i>          | Spain (Amposta,<br>Tarragona)             | <i>Citrus clementina</i>    | x    |      | GU565303            | 543                  | 18S              | 5,8Srev           |
| <i>Tetranychus urticae</i>          | Spain (Betxí,<br>Castelló)                | <i>Citrus clementina</i>    | x    |      | GU565299            | 493                  | 18S              | 5.8Srev           |
| <i>Tetranychus urticae</i>          | Spain (Callosa d'en<br>Sarrià, Alicante)  | <i>Citrus clementina</i>    | x    |      | KP642054            | 566                  | 18S              | 5.8Srev           |

| Species                    | Origin<br>(Country (Locality,<br>County)) | Host plant                | ITS1 | ITS2 | Accession<br>number | Total<br>length (bp) | Primer<br>direct | Primer<br>reverse |
|----------------------------|-------------------------------------------|---------------------------|------|------|---------------------|----------------------|------------------|-------------------|
| <i>Tetranychus urticae</i> | Spain (Málaga)                            | <i>Phaseolus vulgaris</i> | x    |      | GU565301            | 520                  | 18S              | 5.8Srev           |
|                            |                                           | <i>Phaseolus vulgaris</i> |      | x    | GU565314            | 686                  | LC1              | 28Suni            |
| <i>Tetranychus urticae</i> | Spain (Mallorca)                          | <i>Citrus clementina</i>  |      | x    | KP642053            | 701                  | LC1              | 28Suni            |
| <i>Tetranychus urticae</i> | Spain (Onda,<br>Castelló)                 | <i>Citrus clementina</i>  | x    |      | GU565302            | 513                  | 18S              | 5.8Srev           |
| <i>Tetranychus urticae</i> | Spain (Valencia,<br>Llíria)               | <i>Citrus clementina</i>  | x    |      | GU565300            | 531                  | 18S              | 5.8Srev           |
|                            |                                           |                           |      | x    | GU565313            | 640                  | LC1              | 28S               |
| <i>Tetranychus urticae</i> | Florida (Tampa)                           | <i>Musa</i> spp.          | x    |      | KP642052            | 512                  | 18S              | 5.8Srev           |
|                            |                                           |                           |      | x    | GU565312            | 662                  | LC1              | 28Suni            |

Figure S1

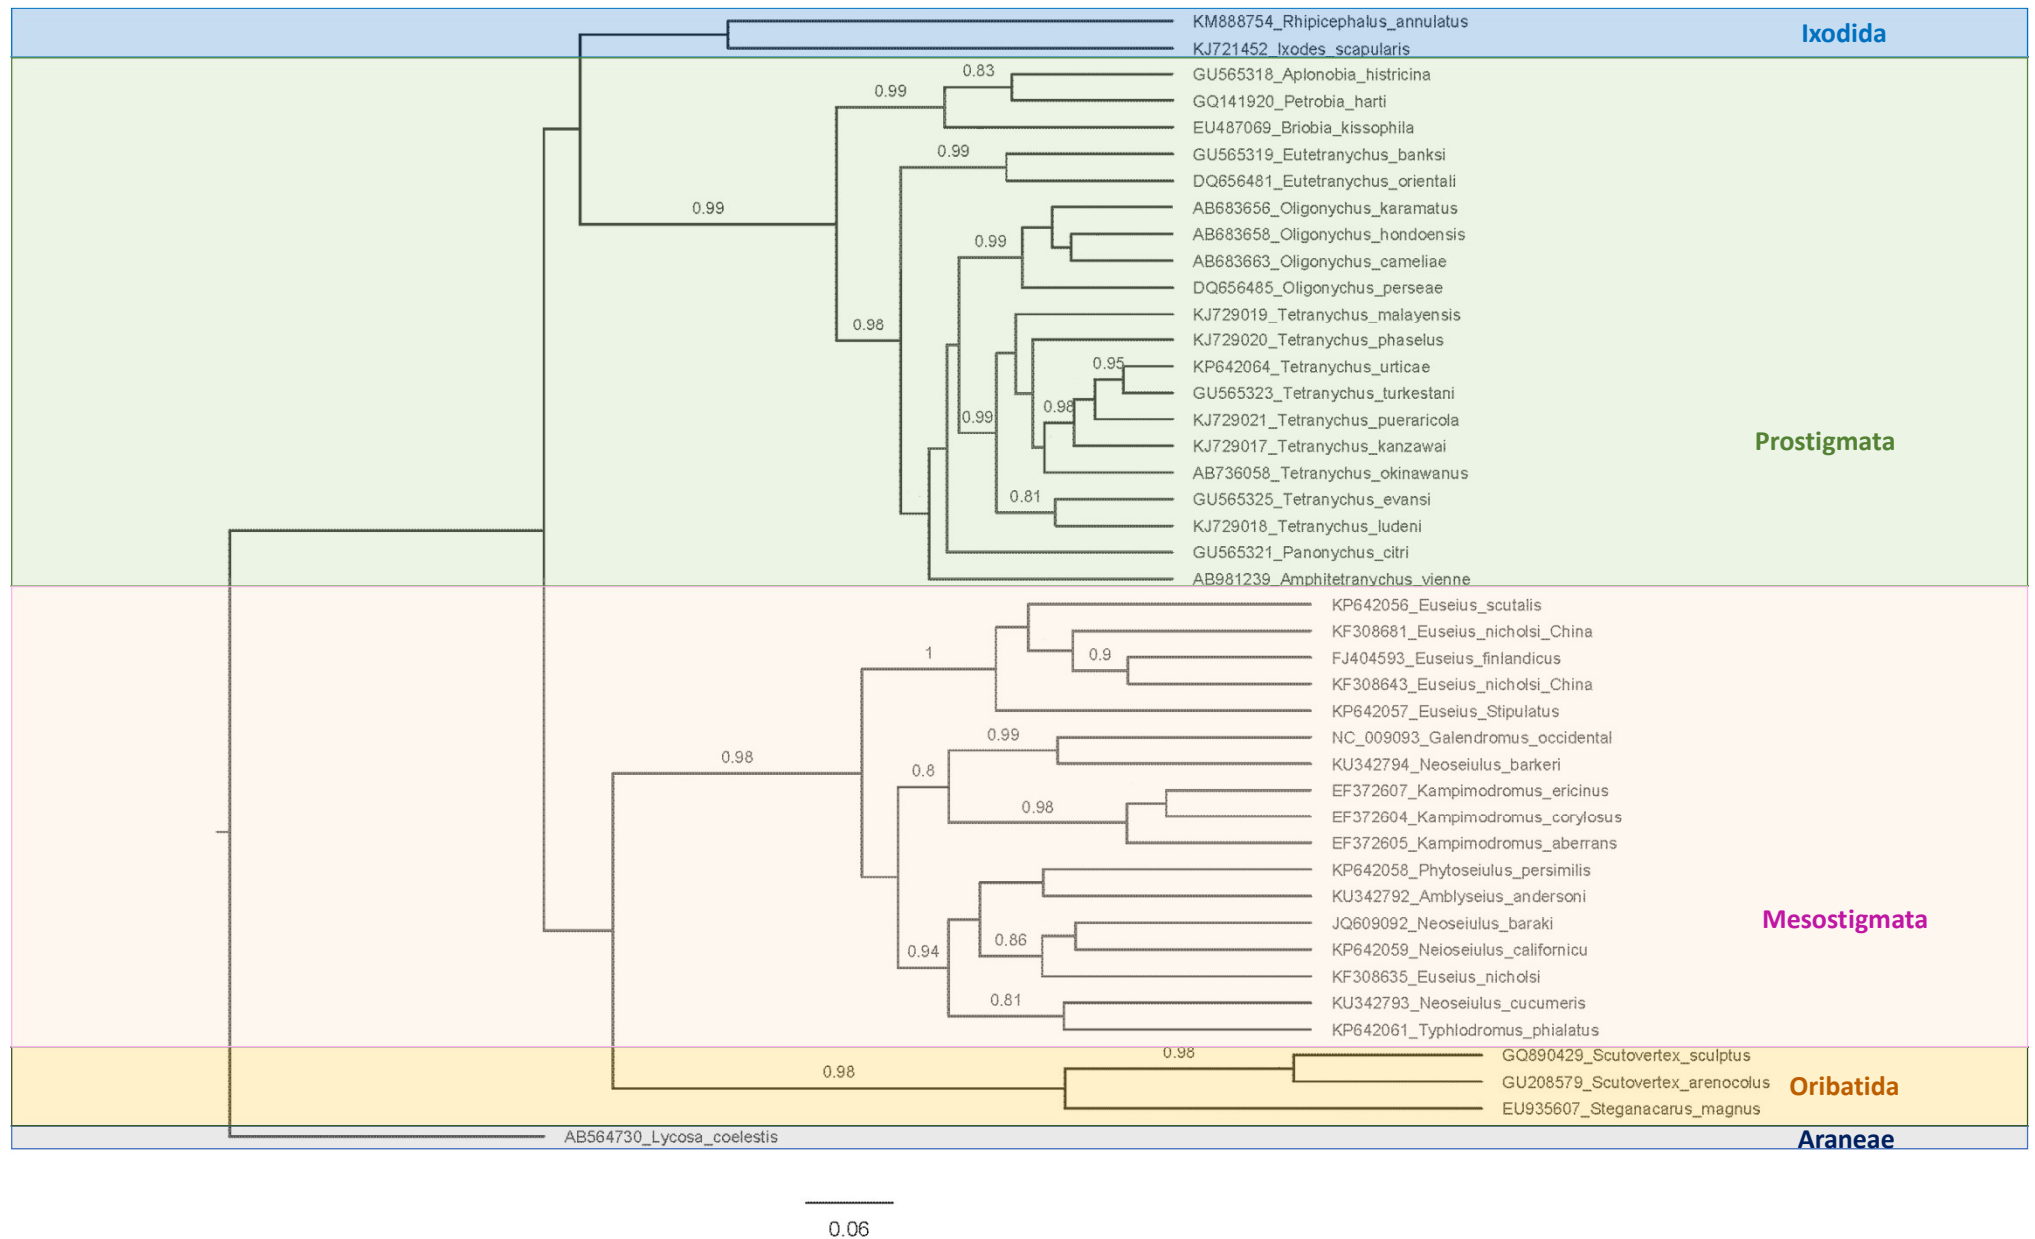

**Figure S1 (previous page).** Evolutionary relationships of Acari taxa based on Cytochrome C oxidase I (COI) sequences alignment. Phylogeny inference was performed using Bayesian analysis (in BEAST) of 43 nucleotide sequences, including three different sequences from *Euseius nicholsi*, under GTR + I + G model for DNA substitution, and under Yule speciation process. Ambiguous positions with less than 50% site coverage were eliminated, rendering only 499 positions in the final dataset. Sequences position of *E. nicholsi* in the phylogenetic tree may indicate their belonging to a cryptic species complex. Acari are shown to be a monophyletic group, with all species belonging to Ixodida (in blue), Oribatida (in yellow), Prostigmata (in green) and Mesostigmata (in orange).

Figure S2

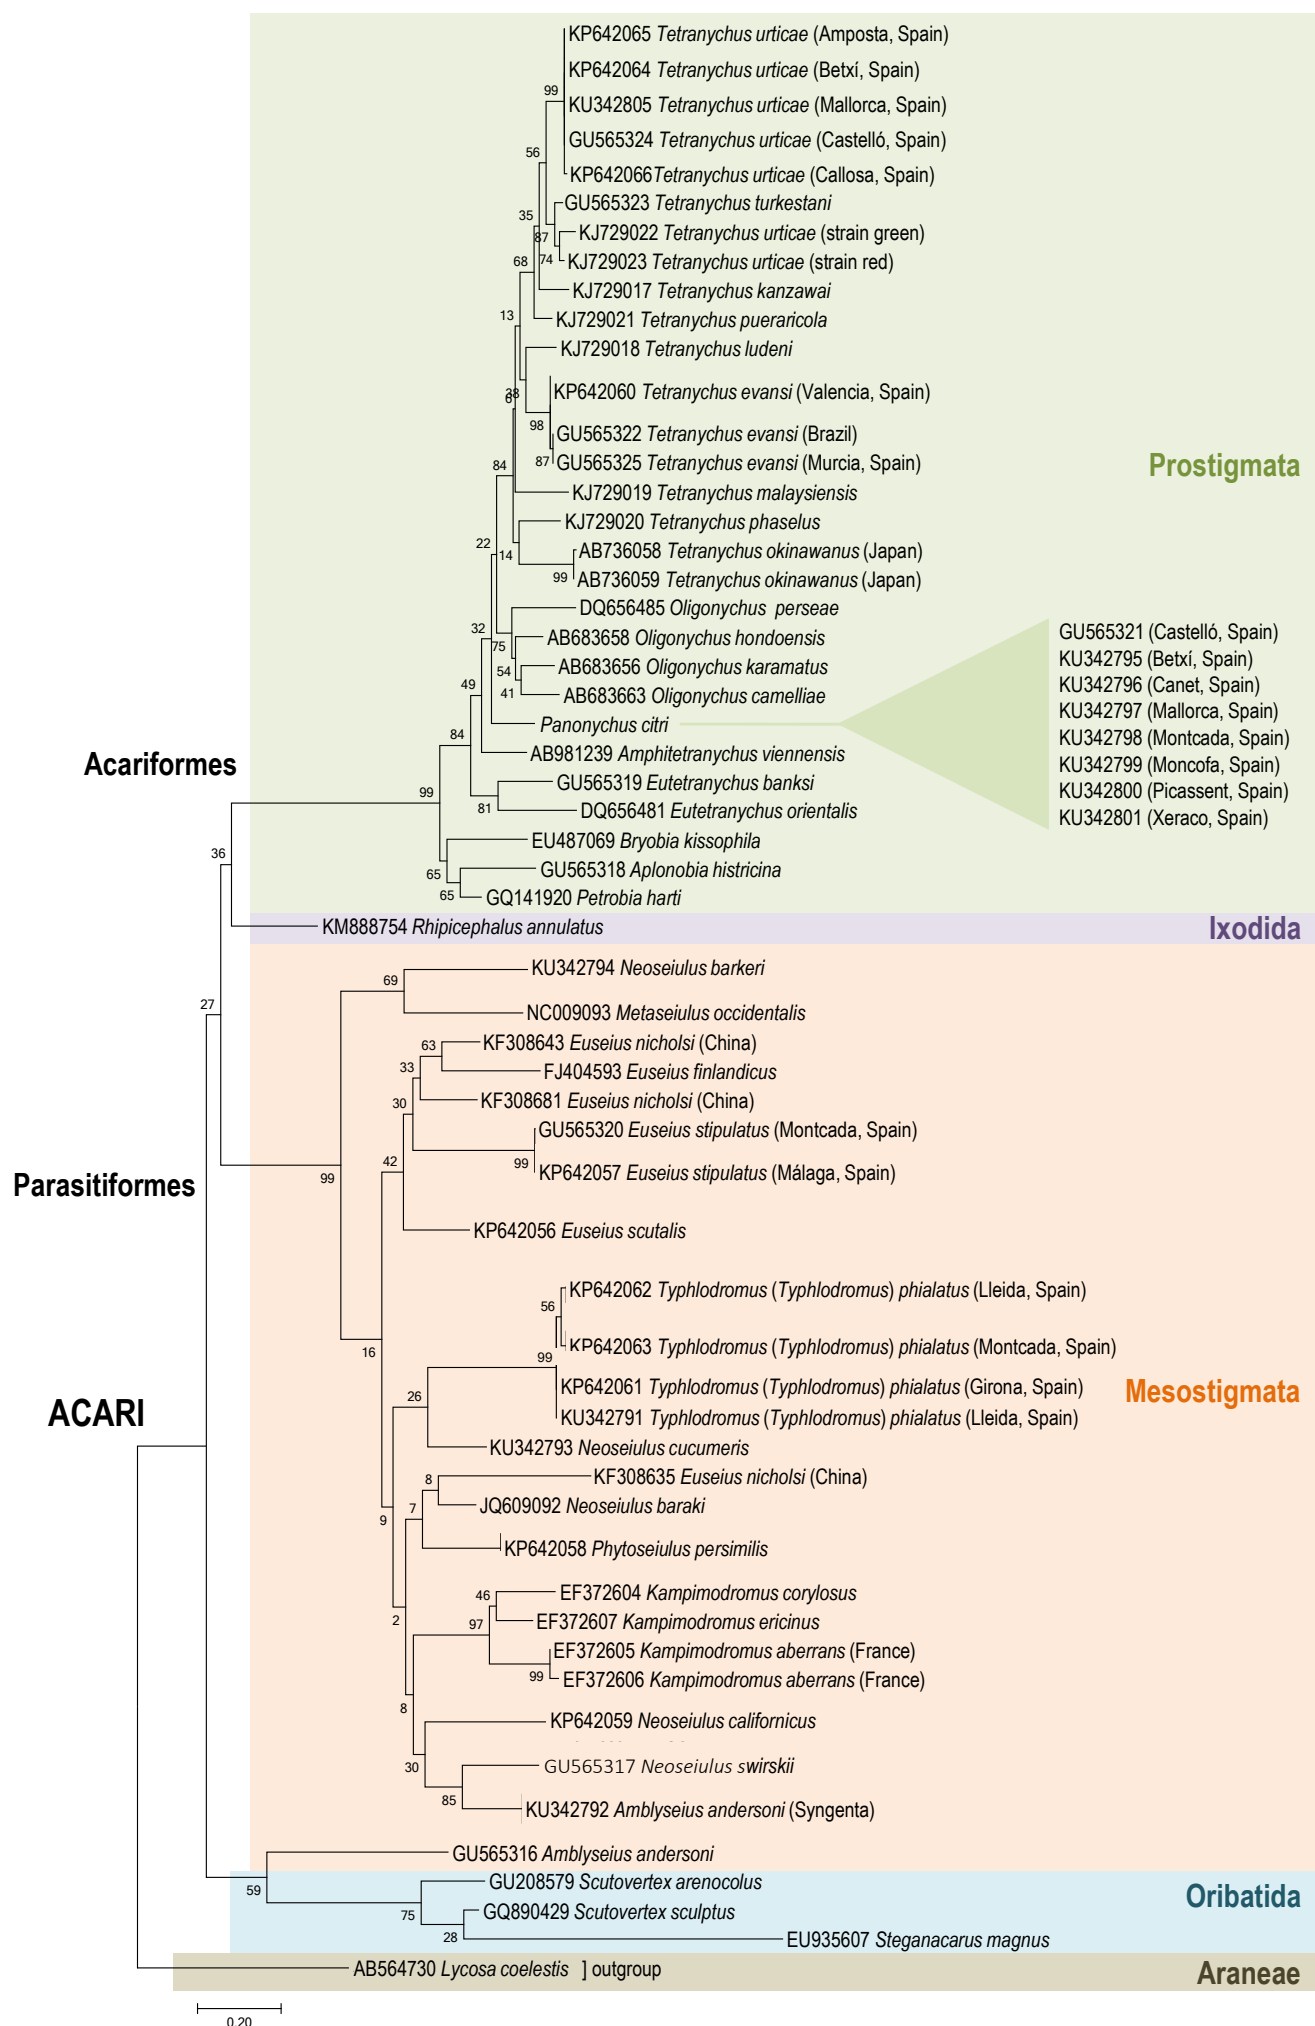

**Figure S2 (previous page).** Evolutionary relationships of taxa based on Acari Cytochrome C oxidase I (COI) sequences alignment. Phylogenetic inference (ML) performed with MEGA X (Kumar *et al.*, 2018) involved 61 nucleotide sequences, with only 453 positions in the final dataset. The optimal tree had a sum of branch length=11.003, bootstrap values over 60% are shown. The tree is drawn to scale in the same units as distance.



Figure S3

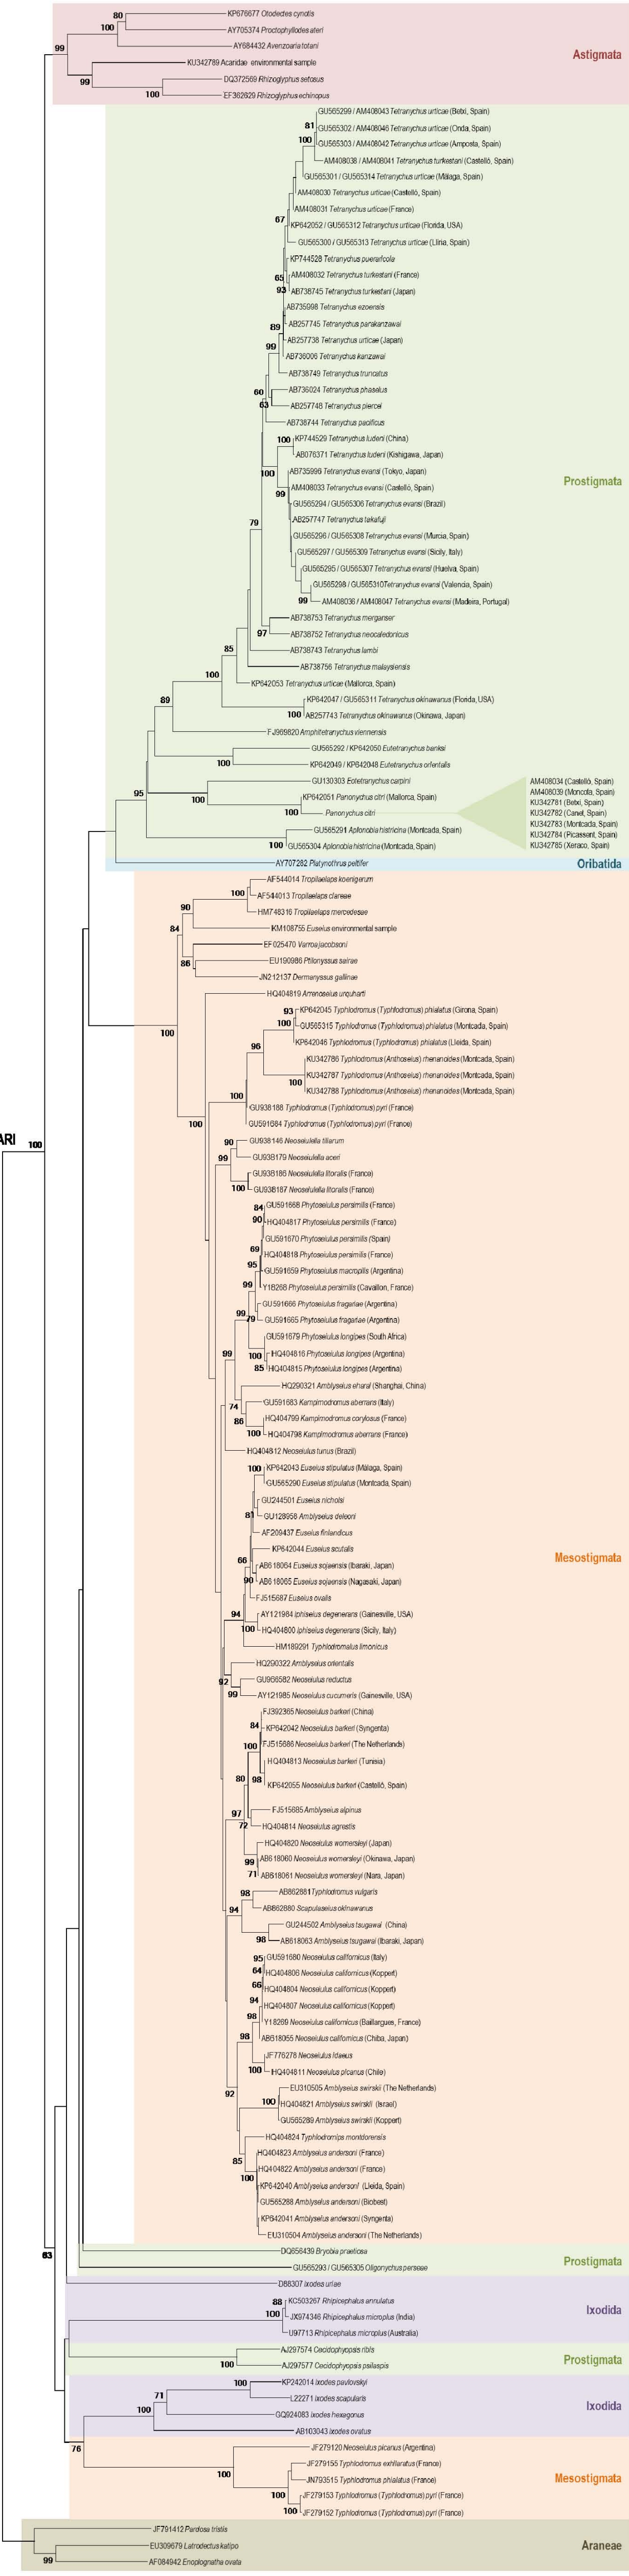

**Figure S3 (previous page).** Evolutionary relationships of taxa based on Internal Transcribed Spacer (ITS) sequences alignment. Phylogenetic inference (ML) performed with MEGA X (Kumar *et al.*, 2018) involved 157 nucleotide sequences. The optimal tree had a sum of branch length=10.2365581, bootstrap values over 60% are shown. The tree is drawn to scale in the same units as distance. Three Aranea species were used as an outgroup, indicated in the tree. Acari are shown to be a monophyletic group with paraphyletic aggregation. Traditional Acariforme and Parasitiforme division is not supported due to long-branch attraction of several individuals.

## References

- Ali, Z. B., Boursot, P., Said, K., Lagnel, J., Chatti, N., & Navajas, M. (2000). Comparison of ribosomal ITS regions among *Androctonus* spp. scorpions (Scorpionida: Buthidae) from Tunisia. *Journal of Medical Entomology*, 37(6), 787-790. doi:10.1603/0022-2585-37.6.787.
- Hurtado, M. A., Ansaloni, T., Cros-Arteil, S., Jacas, J. A., & Navajas, M. (2008). Sequence analysis of the ribosomal internal transcribed spacers region in spider mites (Prostigmata: Tetranychidae) occurring in citrus orchards in Eastern Spain: use for species discrimination. *Annals of Applied Biology*, 153(2), 167-174. doi:10.1111/j.1744-7348.2008.00250.x.
- Ji, Y. -J., Zhang, D. -X., & He, L. -J. (2003). Evolutionary conservation and versatility of a new set of primers for amplifying the ribosomal internal transcribed spacer regions in insects and other invertebrates. *Molecular Ecology Notes*, 3(4), 581-585. doi:10.1046/j.1471-8286.2003.00519.x
- Kumar, S., Stecher, G., Li, M., Knyaz, C., & Tamura, K. (2018). MEGA X: Molecular Evolutionary Genetics Analysis across computing platforms. *Molecular Biology and Evolution*, 35, 1547-1549. doi: 10.1093/molbev/msy096.
- Navajas, M., Fournier, D., Lagnel, J., Gutierrez, J., & Boursot, P. (1996). Mitochondrial COI sequences in mites: evidence for variations in base composition. *Insect Molecular Biology*, 5, 281-285. doi:0.1111/j.1365-2583.1996.tb00102.x.
- Weng-Huang, J.L. (2011) Developing and using expressed sequence TAGs to study the predatory mite *Phytoseiulus persimilis* Athias-Henriot (Parasitiformes, Mesostigmata, Phytoseiidae). Thesis dissertation, Kansas State University. <http://hdl.handle.net/2097/9193> (accessed in 2021).
